# Supplementary material for: On the ionophoric selectivity of nonactin and related macrotetrolide derivatives
Source: Royal Society of Chemistry journal article supplement (doi:10.1039/c6cp05324f), 2016-12-06

Cite this: DOI: 10.1039/xxxxxxxxxx

## Supporting Information to: On the ionophoric selectivity of nonactin and related macrotetrolide derivatives<sup>†</sup>

Bruno Martínez-Haya,<sup>\*a</sup> Juan Ramón Avilés-Moreno,<sup>a</sup> Said Hamad,<sup>a</sup> and José Elguero<sup>b</sup>

Received Date  
Accepted Date

DOI: 10.1039/xxxxxxxxxx

www.rsc.org/journalname

**Figure S1:** Low-energy conformers of the Nonactin complexes with K<sup>+</sup> in chloroform predicted by the computation survey and DFT/6-31+G\* optimization approach of this study. A: non-hydrated complexes; B: complexes hydrated by six water molecules (highlighted in yellow for better visualization). The relative energy of each conformer is indicated in kJ/mol. Chloroform is in all cases treated as an implicit solvent with the PCM method (see manuscript text for details).

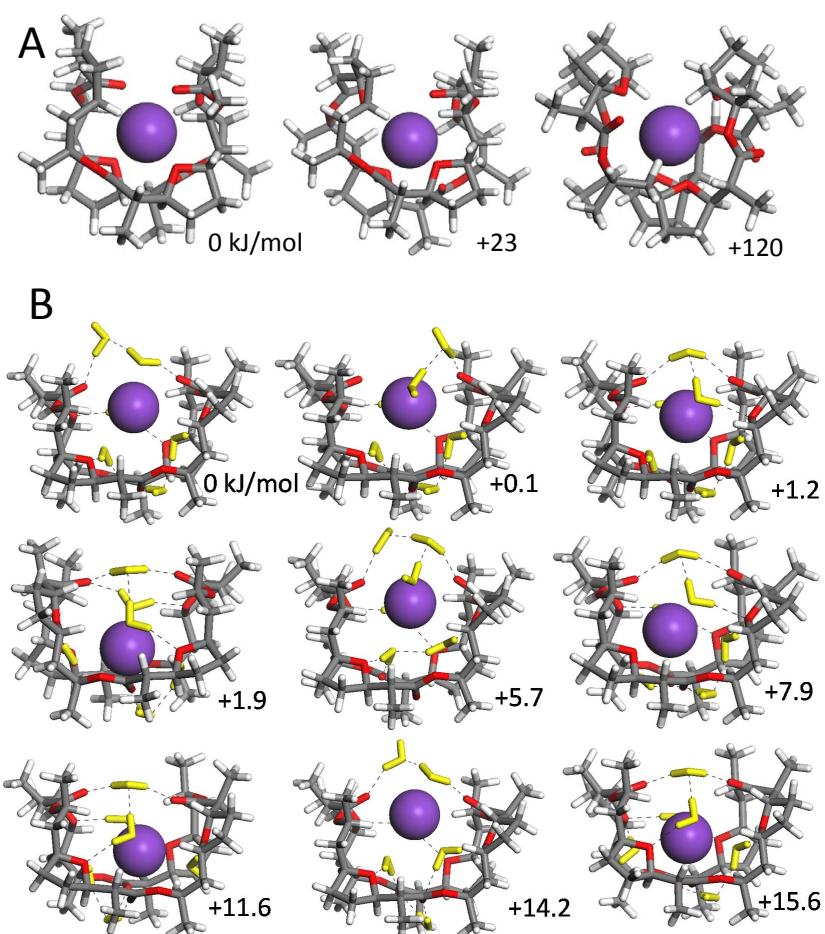

Supplement: c6cp05324f1.pdf [file c6cp05324f1.pdf]
